# Supplementary material for: Menstrual knowledge, sociocultural restrictions, and barriers to menstrual hygiene management in Ghana: Evidence from a multi-method survey among adolescent schoolgirls and schoolboys
Source: PLoS One. 2020 Oct 22;15(10):e0241106. doi: 10.1371/journal.pone.0241106 (PMC7580927; doi:10.1371/journal.pone.0241106)
Supplement: S1 Questionnaire — (PDF) [file pone.0241106.s001.pdf]

## APPENDIX 1

Name of your School \_\_\_\_\_

Questionnaire Identification Number \_\_\_\_\_

| No | <b>Socio-Demographic Variables</b><br><b>Instruction:</b> circle the responses or write the appropriate answer in the space provided |                                                                                                                                    |
|----|--------------------------------------------------------------------------------------------------------------------------------------|------------------------------------------------------------------------------------------------------------------------------------|
| Q1 | What was your age at your last birthday?                                                                                             | _____ Complete years                                                                                                               |
| Q2 | Religion                                                                                                                             | 1. Christian [ ]<br>2. Muslim [ ]<br>3. Traditionalist [ ]<br>4. Other (specify) _____                                             |
| Q3 | At what age did you have your first menstrual period                                                                                 | _____ Years                                                                                                                        |
| Q4 | Does your family have a TV or/and radio?                                                                                             | 1. Yes<br>2. No                                                                                                                    |
| Q5 | What is the occupation of your father/male guardian?                                                                                 | 1. Tailor<br>2. Trader<br>3. Farmer<br>4. Daily labourer<br>5. Formal sector employee<br>6. Unemployed<br>7. Other (specify) _____ |
| Q6 | What is the occupation of your mother/female guardian?                                                                               | 1. Tailor<br>2. Trader<br>3. Farmer<br>4. Daily labourer<br>5. Formal sector employee<br>6. Unemployed<br>7. Other (specify) _____ |
| Q7 | What is the education level of your father/male guardian?                                                                            | 1. No education [ ]<br>2. Basic [ ]<br>3. Secondary [ ]<br>4. Tertiary [ ]                                                         |
| Q8 | What is the education level of your mother/female guardian?                                                                          | 1. No education [ ]<br>2. Basic [ ]<br>3. Secondary [ ]<br>4. Tertiary [ ]                                                         |

| No  | <b>Menstrual Knowledge</b><br><b>Instruction:</b> circle the responses or write the appropriate answer in the space provided |                                                                                                                                                       |
|-----|------------------------------------------------------------------------------------------------------------------------------|-------------------------------------------------------------------------------------------------------------------------------------------------------|
| Q9  | Menstruation is a...                                                                                                         | 1. Normal healthy process in girls and women<br>2. Not a normal healthy process in girls and women<br>3. Other (Specify) _____                        |
| Q10 | Menstrual blood comes from which body part?                                                                                  | 1. Abdomen<br>2. Bladder<br>3. Vagina<br>4. Womb (uterus)<br>5. Other (Specify)_____                                                                  |
| Q11 | At what age, do you think most girls usually get their first period?                                                         | a. _____ years<br>b. Don't know                                                                                                                       |
| Q12 | How many days should a girl's menstrual bleeding last?                                                                       | a. _____ Days<br>b. Don't know                                                                                                                        |
| Q13 | What is the length of the menstrual cycle?                                                                                   | a. _____ Days<br>b. Don't know                                                                                                                        |
| Q14 | Did anyone tell you about menstruation before you started menstruating?                                                      | 1. Yes<br>2. No                                                                                                                                       |
| Q15 | If your response to No.15 is yes, from whom did you first learn about menstruation? (More than one answer is possible)       | 1. Mother<br>2. Teacher<br>3. Friends<br>4. Books<br>5. Media (TV, Radio)<br>6. Relatives (Aunt, grandmother, sister etc)<br>7. Others (Specify)_____ |
| Q16 | What kinds of foods should be avoided during periods?                                                                        | 1. Sugary foods<br>2. Oily foods<br>3. Milk products<br>4. No food restrictions<br>5. Meats<br>6. Eggs<br>7. Snails<br>5. Others (specify)_____       |

| Menstrual hygiene management materials                                                  |                                                                                                                                                |                                                                                                                                                                                                                           | Yes | No | I don't know |
|-----------------------------------------------------------------------------------------|------------------------------------------------------------------------------------------------------------------------------------------------|---------------------------------------------------------------------------------------------------------------------------------------------------------------------------------------------------------------------------|-----|----|--------------|
| Instruction: circle the responses or write the appropriate answer in the space provided |                                                                                                                                                |                                                                                                                                                                                                                           |     |    |              |
| Q17                                                                                     | What absorbent materials do you frequently use during menstruation? (More than one answer is possible)                                         | 1. Reusable cloth pad<br>2. Disposable sanitary pad<br>3. Disposable rag or piece of Cloth<br>4. Cotton wool<br>5. Underwear/pant<br>6. Toilet paper<br>7. Paper (newspaper, pages from books)<br>8. Other (specify)_____ |     |    |              |
| Q18                                                                                     | What influences your choice of menstrual absorbent materials?                                                                                  | 1. Comfort<br>2. Safety<br>3. Cost<br>4. Availability<br>5. Ease of disposal<br>6. Ease of re-use<br>7. Other (specify)_____                                                                                              |     |    |              |
| Q19                                                                                     | Are sanitary pads available for sale in the shops in your town?                                                                                | 1. Yes<br>2. No<br>3. Don't know                                                                                                                                                                                          |     |    |              |
| Q20                                                                                     | Have you bought disposable sanitary pads from a shop in the last two months?                                                                   | 1. Yes<br>2. No                                                                                                                                                                                                           |     |    |              |
| Q21                                                                                     | If no, why have you not bought some?                                                                                                           | 1. I still have some pads<br>2. I don't have money<br>3. My parents buy for me<br>4. It is not yet time to buy for next period<br>5. I am embarrassed to purchase pads<br>6. Others (Specify)_____                        |     |    |              |
| <b>Cultural and Religious Restrictions on Menstruation</b>                              |                                                                                                                                                |                                                                                                                                                                                                                           |     |    |              |
| Q22                                                                                     | It is prohibited to openly discuss menstruation and its management in my culture                                                               |                                                                                                                                                                                                                           |     |    |              |
| Q23                                                                                     | Menstruating girls are confine to a room or a separate menstruation hut to avoid interaction with men                                          |                                                                                                                                                                                                                           |     |    |              |
| Q24                                                                                     | Menstruating girls are prohibited from performing house chores such as cooking, fetching water, sweeping etc                                   |                                                                                                                                                                                                                           |     |    |              |
| Q25                                                                                     | Menstruating girls are forbidden from religious activities (praying, visits to mosque or church, forbidden from touching religious books etc.) |                                                                                                                                                                                                                           |     |    |              |
| Q26                                                                                     | Menstruating girls are considered unclean and impure                                                                                           |                                                                                                                                                                                                                           |     |    |              |
